# Supplementary material
Source: PubMed Central journal article supplement (PMC6683722)
Supplement: ASN.2018080862SupplementaryData1.pdf [file ASN.2018080862SupplementaryData1.pdf]

## Supplemental Table of Contents

### 1. Material and methods

- Human Subjects
- Animals
- Blood Collection and Preparation
- Metabolomics
- Chronic Ang-II infusion into mice
- In vivo treatment of mice with AICAR, Compound C and Ang II
- Mouse blood pressure measurements
- Quantification of renal adenosine levels
- Mouse urine collection and analysis
- Measurement of erythrocyte 2,3-BPG mutase activity
- 2,3-BPG analysis and erythrocyte oxygen release capacity (P50) measurement.
- Real- time PCR of kidneys of mice
- Tissue hypoxia detection measurement in the kidney
- Immunofluorescence analysis of HIF-1 $\alpha$  expression in mouse kidneys

### 2. Supplemental reference

### 3. Heat map of the profiles of metabolites

### 4. Supplemental Table 1: List of all the 218 metabolites been identified through metabolic screening in the whole blood of WT mice with Saline (Control) or Angiotensin II infusion

## **Material and methods**

### **Human Subjects**

Patients with CKD patients admitted to the XiangYa Hospital were identified by nephrologists of the Central South University at Changsha, Hunan, China. Normal individuals were free of kidney disease. CKD patients were selected on the basis of displaying kidney damage (structural or functional abnormalities of the kidney) with glomerular filtration rate  $<60$  mL/min per  $1.73$  m<sup>2</sup> for  $>3$  months. Clinical data for normal individuals and patients with mild or severe CKD are listed in the Table 1.

The research protocol, which included informed consent from the subjects, was approved by the Central South University Committee for the Protection of Human Subjects (No.201512551) .

### **Animals**

Eight- to 10-week-old C57BL/6 wild-type (WT) mice were purchased from Harlan Laboratories (Indianapolis, IN). A2B adenosine receptor (ADORA2B)-deficient mice with C57BL/6 background were generated and genotyped as described previously[1, 2]. A novel line of mice with erythrocyte-specific deletion of Adora2b was generated by crossing mice homozygous for a floxed Adora2b allele with mice expressing Cre recombinase under the control of erythropoietin receptor (EpoR) gene regulatory elements[1]. All protocols involving animal studies were reviewed and approved by the Institutional Animal Welfare Committee of the University of Texas Health Science Center at Houston.

### **Blood Collection and Preparation**

Human and mouse blood were collected and stored as described earlier[1, 2]. Approximately 4 mL human blood was collected with heparin as an anticoagulant for 2,3-BPG measurement with a commercial assay (Roche, USA) as previously described[1]. For plasma adenosine assay, 1 mL EDTA-collected blood was divided into aliquots in tubes containing  $10\text{ }\mu\text{mol/L}$  dipyridamole (an inhibitor of equilibrative nucleoside transporters) and  $10\text{ }\mu\text{mol/L}$  coxycorformycin (an inhibitor of adenosine deaminase). Approximately 1 mL mouse blood was collected and used for 2,3-BPG and plasma adenosine measurement, similar to human blood described above[1, 2]. Approximately 1ml of blood was withdrawn from a forearm vein of study participants, collected in 1.5ml tubes and stored at  $-80^{\circ}\text{C}$  after collection for further analysis.

### **Metabolomics**

Untargeted metabolomics profiling of all samples were performed by Metabolon Inc., as previously described [3]. Briefly, Blood samples were processed by using the automated MicroLab STAR® system from Hamilton Company. Recovery standards were added prior to the first step in the extraction process for QC purposes. Protein was precipitated by a series of organic and

aqueous extractions via a methanol crash, the samples were shaken then centrifuged. The resulting supernatant was split into equal aliquots for analysis on the Liquid chromatography/Mass Spectrometry (LC/MS, LC/MS/MS<sup>2</sup>) or Gas chromatography/Mass Spectrometry (GC/MS) platforms. For the LC/MS and- LC/MS/MS analysis, sample extracts were reconstituted in acidic or basic LC-compatible solvents and separated by a Waters ACQUITY UPLC and analyzed by on a Thermo-Finnigan LTQ mass spectrometer, which consisted of an electrospray ionization (ESI) source and linear ion-trap (LIT) mass analyzer. For GC/MS analysis, samples were re-dried under vacuum desiccation for a minimum of 24 hours prior to being derivatized under dried nitrogen using bistrimethyl-silyl-trifluoroacetamide (BSTFA). The GC column was 5% phenyl and the temperature ramp is from 40° to 300° C in a 16 minute period. Samples were analyzed on a Thermo-Finnigan Trace DSQ fast-scanning single-quadrupole mass spectrometer using electron impact ionization. The instrument was tuned and calibrated for mass resolution and mass accuracy on a daily basis. The information output from the raw data files was automatically extracted by the informatics system developed by Metabolon. The informatics system consisted of four major components, the Laboratory Information Management System (LIMS), the data extraction and peak-identification software, data processing tools for QC and compound identification, and a collection of information interpretation and visualization tools for use by data analysts.

The metadata of this study had been uploaded to the Metabolomicsworkbench public database, Study ID (ST001153).

[https://www.metabolomicsworkbench.org/data/MWTABMetadata4.php?Mode=Study&DataMode=AllData&StudyType=MS&F=Tingting\\_UT\\_20190218\\_135726\\_mwtab\\_analysis\\_1.txt](https://www.metabolomicsworkbench.org/data/MWTABMetadata4.php?Mode=Study&DataMode=AllData&StudyType=MS&F=Tingting_UT_20190218_135726_mwtab_analysis_1.txt)

For statistical analysis and data display, metabolites were deleted if its value was missing in any sample. Fold change of each metabolite median value between Ang II infused group and Saline group was conducted to compare data between the experimental groups. Unpaired 2-tailed Student's t test were used to evaluate the difference between two groups and P values were shown (P<0.05 was considered as statistically significant, green background). All the statistics were performed in Microsoft excel 2016. R package "heatmap" Version 1.0.8 in the freely available program R (<http://cran.r-project.org/>) was used to draw the heatmap.

### **Chronic Ang-II infusion into mice**

Mice were anesthetized with isoflurane (2%), and osmotic minipumps (Alzet model 2001; Alza, Palo Alto, CA) were implanted subcutaneously in the nape of the neck. Ang II (Sigma, MI, USA) was delivered at a rate of 140ng/kg/min into 12-week-old mice for 7 or 14-days. Control mice were infused with PBS[4].

### ***In vivo* treatment of mice with AICAR, Compound C and Ang II**

7-days Ang II chronic infused WT mice were divided into 3 groups. One group was intraperitoneally (i.p.) injected with AICAR (200 mg/kg daily) (TOCRIS, USA) for 7 days[4], the second group was i.p. injected with PBS for 7 days and the third group was i.p. injected with Compound C (20 mg/kg) for 7 days (TOCRIS, USA)[1, 6]. 14-days Ang II chronic infused *EpoR-Cre<sup>+</sup>* and *Adora2b<sup>ff</sup>-EpoR-Cre<sup>+</sup>* were treated with or without AICAR (200 mg/kg daily) (TOCRIS, USA) for 14 day.

### **Mouse blood pressure measurements**

Systolic blood pressure was measured by a carotid catheter-calibrated tail-cuff system (CODA, Kent Scientific, Torrington, CT) before and after mini-pump implantation as described[3, 6]. Specifically, blood pressure was monitored on day 0 which was considered as baseline and continuously measured on the day 3rd, 7th, 10th, and 14th of the 2-week experimental period. After an initial acclimatization of the mice for five cycles, blood pressure was monitored over a period of 20 cycles and averaged for the final blood pressure measurement. To minimize the circadian effects, blood pressure measurement and urine collection were conducted at the same time each day.

### **Quantification of renal adenosine levels**

Mice were anesthetized, and the kidneys were rapidly removed and frozen in liquid nitrogen. Adenosine was extracted from frozen kidney tissue using 0.4N perchloric acid, separated and quantified using reversed phase HPLC as described previously[4].

### **Mouse urine collection and analysis**

Twenty-four-hour urine was collected using metabolic cages (Nalgene). The concentration of albumin and creatinine in the urine were determined using a commercially available kit (Exocell). The ratio of urinary albumin to urinary creatinine was used as an index of urinary protein[7].

### **Measurement of erythrocyte 2,3-BPG mutase activity**

Frozen erythrocyte pellets were used for protein extraction following the protocol as mentioned above. Erythrocyte protein extract were subsequently utilized for measurement of 2,3-BPG mutase activity as described previously with modification<sup>10</sup>. Briefly, erythrocyte protein extract was incubated in 100  $\mu$ l prepared reaction mixture (100 mM Triethanolamine pH 7.6, 1 mM MgSO<sub>4</sub>, 4 mM ATP, 3 mM 3-phosphoglycerate, 10 unit phosphoglycerate kinase for 20 minutes at 300C. Then, the reaction was terminated by adding 25 $\mu$ l of Trichloroacetic acid, and subsequently centrifuged at 10,000gX for 5 minutes. 100  $\mu$ l of the supernatant was mixed with 17  $\mu$ l of 1.8 M Tris base, and the 2,3-BPG level of the mixture was measured by using a commercial assay (Roche, USA) as previous[8].

### **2,3-BPG analysis and erythrocyte oxygen release capacity (P50) measurement.**

2,3-BPG in 20 ml RBC pellets from human and mouse was isolated with 100 ml, 0.6M cold perchloric acid on ice, vortexed and subsequently sonicated for 10 s with output 6 (W-220F, Heat Systems-Ultrasonic, Inc.). The homogenate was centrifuged at 20,000g for 10 min). A volume of 80 ml supernatant was transferred to a new tube and neutralized with 10 ml, 2.5M K<sub>2</sub>CO<sub>3</sub>, then centrifuged at 20,000g for 5min. A volume of 20 ml supernatant was used to quantify 2,3-BPG using a commercially available kit (Roche, Nutley, NJ)[1, 8] For human samples, arterial blood gases were measured and the Hill equation was used to calculate P50 (ref. 58. For mouse samples, 10 ml of whole blood aliquot were mixed with 4.5 ml Hemox Buffer (TCS Scientific Corporation, PA), 10 ml anti-foaming reagent ((TCS Scientific Corporation, PA) and 20 ml 22% BSA in PBS. The mixture was then injected into the Hemox Analyzer (TCS Scientific Corporation, PA) for measurement of oxygen equilibrium curve at the temperature of 37 °C[1, 2].

### **Real- time PCR of kidneys of mice**

RNA was extracted using Trizol reagent (Invitrogen). Transcript levels were quantified using real-time quantitative RT-PCR. Syber green was used for analysis of prepro-ET-1, EDNRA, Col I, FN, GAPDH using the following primers: mouse: prepro-ET-1 F:5'-ctcttctgaccccttgcag-3', R: 5'-agctccttggaagtcacga-3', Ednra F:5'-caaccattacgccacagatg -3', R: 5'-caggaaagacccattggcta-3', Col I F:5'-tctcctggcaaagacggactcaac-3' , R: 5'-tgcggtgttctcaatctgctgac-3' , FN F: 5'-ccaccccataaggcatagg-3', R: 5'-gtaggggtcaaagcagagtcac-3', Gapdh F:5'-tgacctcaactacatggtctaca-3' , R: 5'-cttccattctcgcccttg-3'. PCR was performed on an ABI Prism 7700 sequence Detector (Applied Biosystems) under the following conditions: 95°C, 10 min; 95°C, 30 s; 60°C, 30 s; 72°C, 1min; 40 cycles, 95°C, 1min, 60°C, 30 s, 95°C, 30 s. Each cDNA sample was run in triplicate. For data analysis, the 2<sup>-ΔΔC<sub>t</sub></sup> method was used. For each gene, the fold changes were calculated as difference in kidney expression[7].

### **Tissue hypoxia detection measurement in the kidney**

Tissue hypoxia levels were assessed by Hypoxyprobe immunohistochemistry as described before[1, 10]. Briefly, animals were administered Hypoxyprobe (Hypoxyprobe, Inc.) via intraperitoneal injection (60 mg/kg body weight). One hour after injection, kidney tissues were harvested, and fixed overnight in 4% buffered formalin, and embedded in paraffin. According to the manufacturer's instructions (Hypoxyprobe-1 Omni-Kit), sections of 4μm were cut and mounted on glass slides, deparaffinized through serial baths in xylene and rehydrated in a graded series of alcohol and distilled water. Endogenous peroxidase activity was quenched by 10 min of incubation in a 3% hydrogen peroxide/methanol buffer. Antigen retrieval was enhanced by autoclaving slides in sodium citrate buffer (pH 6.0) at 95°C for 15 min. After blocking with a Biotin Blocking System (Dako), the slides were then incubated with rabbit anti-PAb2627AP in a humidified chamber at 4°C overnight. After the primary antibody incubation, anti-rabbit IgG ABC staining system kit (VECTASTAIN ABS-AP, VECTOR LAB) was used according to the stained with alkaline phosphatase substrate kit (VECTASTAIN ABS-AP, VECTOR LAB) and

counterstained with hematoxylin. Quantification of the IHC staining was performed using the Image-Pro Plus software (Media Cybernetics, Bethesda, MD). The density of the red staining was measured. The average densities of 20 areas per samples were determined and the SEM is indicated.

### **ELISA measurement of erythrocyte phosphorylation of AMPK $\alpha$ at Thr172**

Erythrocyte protein extract from human and mouse blood were collected as described above[8]. Next, phosphorylation levels of erythrocyte AMPK $\alpha$  at Thr172 were quantitatively measured by using commercially available ELISA kits (A Solid phase sandwich ELISA, Cell Signaling) [1].

### **Immunofluorescence analysis of HIF-1 $\alpha$ expression in mouse kidneys**

Immunofluorescence for HIF-1  $\alpha$  was carried out with the formalin fixed tissues. Sections (4 $\mu$ m) deparaffinized through serial baths in xylene and rehydrated in a graded series of alcohol and distilled water. After antigen retrieval and blocking as above, the slides were then incubated with mouse anti-HIF-1  $\alpha$  antibody (Novus Biologicals, 1:100 dilution) in a humidified chamber at 4°C overnight. After the primary antibody incubation, anti-rabbit secondary antibody was used for 1 hour preventing from light. Quantification of the immunofluorescence staining was performed using the Image-Pro Plus software (Media Cybernetics, Bethesda, MD). The density of the red colors was measured. The average densities of 20 areas per kidneys were determined and the SEM is indicated.

### **Statistical analyses**

All data were expressed as mean  $\pm$  SEM. Unpaired student's t tests were applied in two-group analysis. Differences between the means of multiple groups were compared by the one-way analysis of variance (ANOVA), followed by a Tukey's multiple comparisons test. Comparison of the data obtained at different time points was analyzed by 2-way repeated measures, followed by the Tukey post hoc test. Linear correlations were analyzed by Pearson's correlation coefficient. A value of  $P < 0.05$  was considered significant. Statistical programs were run using GraphPad Prism 5 software (GraphPad Software, San Diego, CA).

### **Supplemental reference**

1. Liu, H., et al., *Beneficial Role of Erythrocyte Adenosine A2B Receptor-Mediated AMP-Activated Protein Kinase Activation in High-Altitude Hypoxia*. Circulation, 2016. **134**(5): p. 405-21.
2. Sun, K., et al., *Elevated adenosine signaling via adenosine A2B receptor induces normal and sickle erythrocyte sphingosine kinase 1 activity*. Blood, 2015. **125**(10): p. 1643-52.
3. Evans A.M., et al., *Integrated, nontargeted ultrahigh performance liquid chromatography/electrospray ionization tandem mass spectrometry platform for the identification and relative*

- quantification of the small-molecule complement of biological systems*. Anal Chem, 2009. 81:p.6656–67.
4. Zhang, W., et al., *Elevated ecto-5'-nucleotidase-mediated increased renal adenosine signaling via A2B adenosine receptor contributes to chronic hypertension*. Circ Res, 2013. **112**(11): p. 1466-78.
  5. Narkar, V.A., et al., *AMPK and PPARdelta agonists are exercise mimetics*. Cell, 2008. **134**(3): p. 405-15.
  6. Abdulrahman, R.M., et al., *Impact of Metformin and compound C on NIS expression and iodine uptake in vitro and in vivo: a role for CRE in AMPK modulation of thyroid function*. Thyroid, 2014. **24**(1): p. 78-87.
  7. Luo, R., et al., *Elevated Endothelial Hypoxia-Inducible Factor-1alpha Contributes to Glomerular Injury and Promotes Hypertensive Chronic Kidney Disease*. Hypertension, 2015. **66**(1): p. 75-84.
  8. Zhang, Y., et al., *Detrimental effects of adenosine signaling in sickle cell disease*. Nat Med, 2011. **17**(1): p. 79-86.
  9. Sun, K., et al., *Sphingosine-1-phosphate promotes erythrocyte glycolysis and oxygen release for adaptation to high-altitude hypoxia*. Nat Commun, 2016. **7**: p. 12086.
  10. Song, A., et al., *Erythrocytes retain hypoxic adenosine response for faster acclimatization upon re-ascent*. Nat Commun, 2017. **8**: p. 14108.

Heatmap showing relative abundance of metabolites in selected metabolism pathways in the whole blood of WT mice with Saline (Control) or Ang II infusion (Ang II). N=6 mice for control group, N=5 mice for Ang II group.

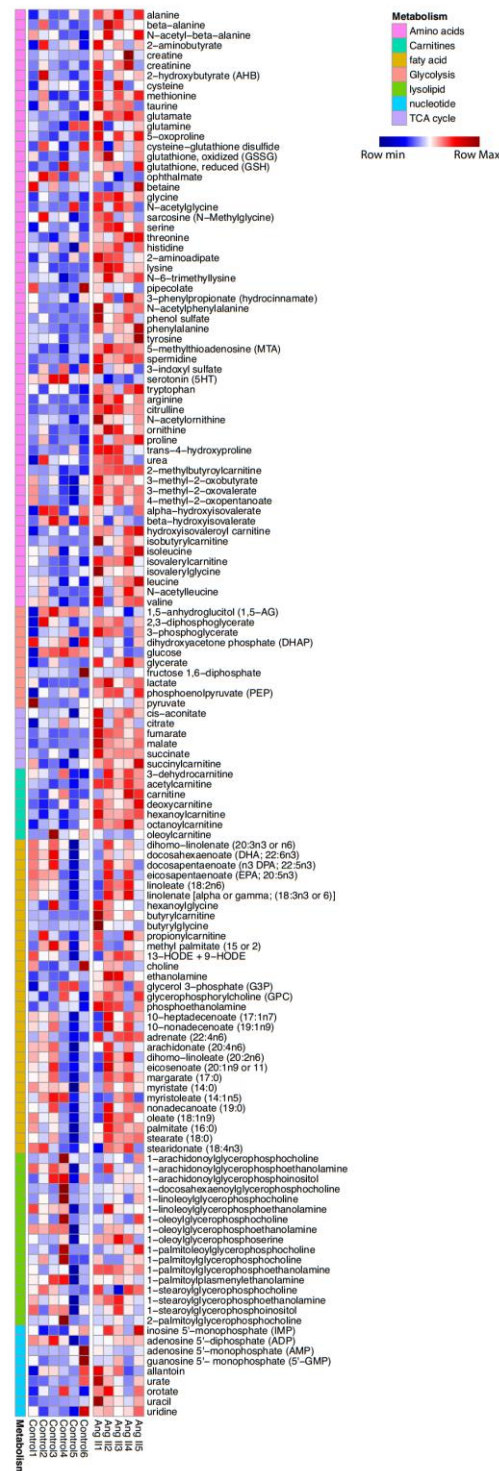

Supplemental Table 1

| Metabolites                         | PATHWAY    | Control Median | Ang II Median | Fold Change | P value |
|-------------------------------------|------------|----------------|---------------|-------------|---------|
| alanine                             | Amino acid | 51,645,514.0   | 89,689,184.0  | 1.737       | 0.004   |
| beta-alanine                        | Amino acid | 108,507.9      | 156,393.2     | 1.441       | 0.077   |
| N-acetyl-beta-alanine               | Amino acid | 25,632.6       | 29,551.9      | 1.153       | 0.049   |
| 2-aminobutyrate                     | Amino acid | 941,249.1      | 1,141,596.0   | 1.213       | 0.205   |
| creatine                            | Amino acid | 961,813.3      | 1,336,434.5   | 1.389       | 0.104   |
| creatinine                          | Amino acid | 27,660.0       | 51,188.0      | 1.851       | 0.036   |
| 2-hydroxybutyrate (AHB)             | Amino acid | 601,363.3      | 864,309.6     | 1.437       | 0.321   |
| cysteine                            | Amino acid | 2,248,681.8    | 2,358,157.5   | 1.049       | 0.153   |
| homocysteine                        | Amino acid | 67,271.3       | 106,889.4     | 1.589       | 0.091   |
| methionine                          | Amino acid | 2,984,908.2    | 5,716,055.5   | 1.915       | 0.011   |
| N-acetylmethionine                  | Amino acid | 5,680.7        | 10,924.6      | 1.923       | 0.001   |
| taurine                             | Amino acid | 189,982.5      | 255,095.0     | 1.343       | 0.057   |
| glutamate                           | Amino acid | 1,032,461.3    | 1,284,100.1   | 1.244       | 0.000   |
| glutamine                           | Amino acid | 589,665.2      | 623,901.3     | 1.058       | 0.635   |
| 5-oxoproline                        | Amino acid | 238,453.9      | 359,737.6     | 1.509       | 0.001   |
| cysteine-glutathione disulfide      | Amino acid | 472,878.8      | 503,564.1     | 1.065       | 0.805   |
| glutathione, oxidized (GSSG)        | Amino acid | 14,045,026.5   | 15,698,076.0  | 1.118       | 0.020   |
| glutathione, reduced (GSH)          | Amino acid | 38,755.6       | 87,953.2      | 2.269       | 0.191   |
| ophthalmate                         | Amino acid | 334,512.9      | 284,034.6     | 0.849       | 0.171   |
| betaine                             | Amino acid | 1,383,484.6    | 1,287,533.4   | 0.931       | 0.698   |
| dimethylglycine                     | Amino acid | 479,846.2      | 382,609.1     | 0.797       | 0.269   |
| glycine                             | Amino acid | 23,825,972.0   | 40,342,652.0  | 1.693       | 0.000   |
| N-acetylglycine                     | Amino acid | 142,938.0      | 232,250.0     | 1.625       | 0.152   |
| sarcosine (N-Methylglycine)         | Amino acid | 560,106.0      | 633,402.0     | 1.131       | 0.445   |
| serine                              | Amino acid | 8,360,846.3    | 13,692,420.0  | 1.638       | 0.002   |
| threonine                           | Amino acid | 195,553.1      | 285,982.3     | 1.462       | 0.005   |
| histidine                           | Amino acid | 42,039.0       | 52,350.4      | 1.245       | 0.074   |
| 2-aminoadipate                      | Amino acid | 713,663.5      | 1,099,584.4   | 1.541       | 0.008   |
| lysine                              | Amino acid | 1,323,607.7    | 2,869,885.3   | 2.168       | 0.001   |
| N-6-trimethyllysine                 | Amino acid | 1,438,829.9    | 1,604,961.1   | 1.115       | 0.005   |
| pipecolate                          | Amino acid | 386,585.2      | 539,359.2     | 1.395       | 0.666   |
| 2-(4-hydroxyphenyl)propionate       | Amino acid | 174,065.9      | 288,672.0     | 1.658       | 0.036   |
| 3-(4-hydroxyphenyl)lactate          | Amino acid | 16,166.2       | 19,226.2      | 1.189       | 0.095   |
| 3-phenylpropionate (hydrocinnamate) | Amino acid | 70,534.0       | 121,541.3     | 1.723       | 0.094   |
| N-acetylphenylalanine               | Amino acid | 44,478.8       | 68,197.4      | 1.533       | 0.012   |
| phenol sulfate                      | Amino acid | 35,895.8       | 186,346.4     | 5.191       | 0.012   |
| phenylacetylglutamine               | Amino acid | 12,508.3       | 13,741.2      | 1.099       | 0.480   |

|                                   |              |               |               |       |       |
|-----------------------------------|--------------|---------------|---------------|-------|-------|
| phenylalanine                     | Amino acid   | 9,055,644.5   | 11,603,604.0  | 1.281 | 0.003 |
| tyrosine                          | Amino acid   | 3,730,607.3   | 4,483,908.0   | 1.202 | 0.077 |
| 5-methylthioadenosine (MTA)       | Amino acid   | 101,348.6     | 169,920.3     | 1.677 | 0.000 |
| spermidine                        | Amino acid   | 1,849,450.6   | 2,735,224.3   | 1.479 | 0.000 |
| 3-indoxyl sulfate                 | Amino acid   | 64,524.2      | 85,716.0      | 1.328 | 0.550 |
| C-glycosyltryptophan              | Amino acid   | 18,847.0      | 22,269.9      | 1.182 | 0.151 |
| kynurenine                        | Amino acid   | 88,597.4      | 98,994.2      | 1.117 | 0.216 |
| N-acetyltryptophan                | Amino acid   | 10,259.2      | 14,277.2      | 1.392 | 0.004 |
| serotonin (5HT)                   | Amino acid   | 170,394.7     | 120,044.5     | 0.705 | 0.006 |
| tryptophan                        | Amino acid   | 6,031,931.0   | 8,028,306.0   | 1.331 | 0.011 |
| arginine                          | Amino acid   | 2,072,133.3   | 4,930,608.0   | 2.379 | 0.001 |
| citrulline                        | Amino acid   | 190,260.2     | 320,091.4     | 1.682 | 0.000 |
| homocitrulline                    | Amino acid   | 18,114.7      | 25,103.2      | 1.386 | 0.096 |
| N-acetylmethionine                | Amino acid   | 263,479.7     | 308,241.6     | 1.170 | 0.023 |
| ornithine                         | Amino acid   | 1,805,053.1   | 2,957,174.0   | 1.638 | 0.005 |
| proline                           | Amino acid   | 1,124,065.5   | 1,639,845.6   | 1.459 | 0.004 |
| trans-4-hydroxyproline            | Amino acid   | 691,670.1     | 1,725,347.3   | 2.494 | 0.007 |
| urea                              | Amino acid   | 193,751,448.0 | 229,500,096.0 | 1.185 | 0.264 |
| 2-methylbutyrylcarnitine          | Amino acid   | 31,371.8      | 44,470.9      | 1.418 | 0.000 |
| 3-methyl-2-oxobutyrate            | Amino acid   | 58,766.5      | 73,398.3      | 1.249 | 0.062 |
| 3-methyl-2-oxovalerate            | Amino acid   | 116,124.9     | 191,409.5     | 1.648 | 0.011 |
| 4-methyl-2-oxopentanoate          | Amino acid   | 112,158.9     | 234,815.7     | 2.094 | 0.009 |
| alpha-hydroxyisovalerate          | Amino acid   | 1,088,150.8   | 970,529.8     | 0.892 | 0.823 |
| beta-hydroxyisovalerate           | Amino acid   | 121,578.1     | 72,889.9      | 0.600 | 0.289 |
| hydroxyisovaleroyl carnitine      | Amino acid   | 59,983.4      | 92,951.5      | 1.550 | 0.004 |
| isobutyrylcarnitine               | Amino acid   | 43,242.9      | 69,573.2      | 1.609 | 0.010 |
| isoleucine                        | Amino acid   | 9,711,431.0   | 10,295,614.0  | 1.060 | 0.198 |
| isovalerylcarnitine               | Amino acid   | 44,779.2      | 61,666.1      | 1.377 | 0.002 |
| isovalerylglycine                 | Amino acid   | 67,734.1      | 86,207.5      | 1.273 | 0.038 |
| leucine                           | Amino acid   | 14,116,956.0  | 16,784,376.0  | 1.189 | 0.042 |
| N-acetylleucine                   | Amino acid   | 81,063.2      | 142,304.6     | 1.755 | 0.017 |
| valine                            | Amino acid   | 4,311,549.0   | 5,479,219.5   | 1.271 | 0.056 |
| erythronate                       | Carbohydrate | 94,956.0      | 130,737.0     | 1.377 | 0.136 |
| N-acetylneuraminate               | Carbohydrate | 300,330.0     | 324,302.1     | 1.080 | 0.518 |
| fructose                          | Carbohydrate | 1,302,043.0   | 1,373,237.6   | 1.055 | 0.268 |
| mannose                           | Carbohydrate | 4,275,592.8   | 2,834,863.3   | 0.663 | 0.117 |
| 1,5-anhydroglucitol (1,5-AG)      | Carbohydrate | 2,119,225.2   | 1,776,432.8   | 0.838 | 0.160 |
| 2,3-diphosphoglycerate            | Carbohydrate | 3,140,983.0   | 4,116,786.3   | 1.311 | 0.031 |
| 3-phosphoglycerate                | Carbohydrate | 2,361,776.9   | 3,100,091.8   | 1.313 | 0.070 |
| dihydroxyacetone phosphate (DHAP) | Carbohydrate | 344,899.0     | 251,529.0     | 0.729 | 0.340 |
| glucose                           | Carbohydrate | 251,990,568.0 | 164,908,704.0 | 0.654 | 0.150 |
| glycerate                         | Carbohydrate | 180,827.5     | 249,222.1     | 1.378 | 0.003 |

|                                    |                        |               |               |       |         |
|------------------------------------|------------------------|---------------|---------------|-------|---------|
| fructose 1,6-diphosphate           | Carbohydrate           | 101,689.5     | 105,205.2     | 1.035 | 0.495   |
| lactate                            | Carbohydrate           | 77,210,592.0  | 198,715,808.0 | 2.574 | 0.001   |
| phosphoenolpyruvate (PEP)          | Carbohydrate           | 1,092,893.4   | 1,506,538.5   | 1.378 | 0.020   |
| pyruvate                           | Carbohydrate           | 77,738.3      | 165,925.9     | 2.134 | 0.997   |
| threonate                          | Cofactors and vitamins | 376,297.0     | 468,322.0     | 1.245 | 0.241   |
| heme                               | Cofactors and vitamins | 1,068,121.8   | 1,308,941.1   | 1.225 | 0.891   |
| adenosine 5'diphosphoribose        | Cofactors and vitamins | 185,730.5     | 190,668.3     | 1.027 | 0.491   |
| nicotinamide                       | Cofactors and vitamins | 7,164,177.8   | 7,820,276.5   | 1.092 | 0.129   |
| trigonelline (N'-methylnicotinate) | Cofactors and vitamins | 150,133.9     | 234,141.3     | 1.560 | 0.009   |
| pantothenate                       | Cofactors and vitamins | 106,178.7     | 172,645.2     | 1.626 | 0.000   |
| alpha-tocopherol                   | Cofactors and vitamins | 46,681.0      | 59,133.0      | 1.267 | 0.119   |
| cis-aconitate                      | Energy                 | 145,094.4     | 186,705.1     | 1.287 | 0.053   |
| citrate                            | Energy                 | 7,657,857.5   | 9,022,458.0   | 1.178 | 0.153   |
| fumarate                           | Energy                 | 216,976.6     | 402,840.7     | 1.857 | 0.000   |
| malate                             | Energy                 | 702,244.5     | 1,151,349.1   | 1.640 | 0.000   |
| succinate                          | Energy                 | 52,240.9      | 80,670.7      | 1.544 | 0.003   |
| succinylcarnitine                  | Energy                 | 109,840.5     | 129,338.0     | 1.178 | 0.021   |
| acetylphosphate                    | Energy                 | 1,331,728.1   | 1,484,740.9   | 1.115 | 0.583   |
| phosphate                          | Energy                 | 189,109,288.0 | 195,629,712.0 | 1.034 | 0.844   |
| pyrophosphate (PPi)                | Energy                 | 892,249.5     | 1,019,729.9   | 1.143 | 0.645   |
| alpha-muricholate                  | Lipid                  | 54,437.4      | 12,578.4      | 0.231 | 0.267   |
| cholate                            | Lipid                  | 34,174.0      | 10,247.4      | 0.300 | 0.260   |
| tauro-beta-muricholate             | Lipid                  | 29,586.5      | 25,484.8      | 0.861 | 0.336   |
| taurocholate                       | Lipid                  | 27,506.7      | 69,886.8      | 2.541 | 0.478   |
| taurodeoxycholate                  | Lipid                  | 7,247.4       | 18,261.9      | 2.520 | 0.243   |
| tauroursodeoxycholate              | Lipid                  | 287,213.3     | 10,475.7      | 0.036 | #DIV/0! |
| 3-dehydrocarnitine                 | Lipid                  | 1,238,776.3   | 1,702,888.3   | 1.375 | 0.098   |
| acetylcarnitine                    | Lipid                  | 3,554,340.9   | 5,156,765.5   | 1.451 | 0.000   |
| carnitine                          | Lipid                  | 990,437.1     | 1,099,840.3   | 1.110 | 0.056   |
| deoxycarnitine                     | Lipid                  | 225,939.2     | 273,921.1     | 1.212 | 0.006   |
| hexanoylcarnitine                  | Lipid                  | 26,710.6      | 46,227.5      | 1.731 | 0.000   |
| octanoylcarnitine                  | Lipid                  | 52,835.5      | 74,658.5      | 1.413 | 0.001   |
| oleoylcarnitine                    | Lipid                  | 30,457.4      | 23,731.9      | 0.779 | 0.326   |
| 12-HEPE                            | Lipid                  | 1,781,332.7   | 2,039,065.4   | 1.145 | 0.640   |
| 12-HETE                            | Lipid                  | 2,324,695.0   | 1,244,194.4   | 0.535 | 0.043   |
| dihomo-linolenate (20:3n3 or n6)   | Lipid                  | 365,006.1     | 356,495.6     | 0.977 | 0.608   |
| docosahexaenoate (DHA; 22:6n3)     | Lipid                  | 3,626,191.1   | 3,537,821.0   | 0.976 | 0.913   |
| docosapentaenoate (n3 DPA; 22:5n3) | Lipid                  | 582,000.3     | 644,838.1     | 1.108 | 0.706   |
| eicosapentaenoate (EPA; 20:5n3)    | Lipid                  | 1,175,129.0   | 945,899.5     | 0.805 | 0.545   |
| linoleate (18:2n6)                 | Lipid                  | 13,982,038.0  | 18,403,560.0  | 1.316 | 0.224   |

|                                            |       |              |              |       |       |
|--------------------------------------------|-------|--------------|--------------|-------|-------|
| linolenate [alpha or gamma; (18:3n3 or 6)] | Lipid | 1,384,669.3  | 1,894,397.0  | 1.368 | 0.142 |
| hexanoylglycine                            | Lipid | 25,601.6     | 37,814.9     | 1.477 | 0.242 |
| butyrylcarnitine                           | Lipid | 91,626.1     | 187,728.1    | 2.049 | 0.009 |
| butyrylglycine                             | Lipid | 53,052.7     | 82,162.3     | 1.549 | 0.190 |
| propionylcarnitine                         | Lipid | 365,491.2    | 444,291.0    | 1.216 | 0.222 |
| malonylcarnitine                           | Lipid | 43,009.7     | 37,712.4     | 0.877 | 0.383 |
| 17-methylstearate                          | Lipid | 25,163.8     | 26,005.8     | 1.033 | 0.962 |
| methyl palmitate (15 or 2)                 | Lipid | 326,902.6    | 300,732.6    | 0.920 | 1.000 |
| azelate (nonanedioate)                     | Lipid | 5,573.8      | 7,604.8      | 1.364 | 0.061 |
| 13-HODE + 9-HODE                           | Lipid | 250,855.0    | 317,283.0    | 1.265 | 0.292 |
| 2-hydroxystearate                          | Lipid | 29,990.7     | 39,469.7     | 1.316 | 0.221 |
| choline                                    | Lipid | 888,145.5    | 969,200.5    | 1.091 | 0.994 |
| ethanolamine                               | Lipid | 89,898.5     | 152,686.9    | 1.698 | 0.003 |
| glycerol 3-phosphate (G3P)                 | Lipid | 850,548.5    | 1,055,539.6  | 1.241 | 0.405 |
| glycerophosphorylcholine (GPC)             | Lipid | 491,107.6    | 550,026.0    | 1.120 | 0.067 |
| phosphoethanolamine                        | Lipid | 283,025.3    | 459,869.5    | 1.625 | 0.007 |
| chiro-inositol                             | Lipid | 261,053.0    | 364,294.5    | 1.395 | 0.522 |
| myo-inositol                               | Lipid | 6,069,591.5  | 6,165,021.0  | 1.016 | 0.692 |
| pinitol                                    | Lipid | 147,703.2    | 204,861.0    | 1.387 | 0.055 |
| 1,2-propanediol                            | Lipid | 800,759.6    | 817,265.0    | 1.021 | 0.662 |
| 3-hydroxybutyrate (BHBA)                   | Lipid | 3,816,605.6  | 7,640,417.0  | 2.002 | 0.000 |
| 10-heptadecenoate (17:1n7)                 | Lipid | 291,744.5    | 340,506.9    | 1.167 | 0.295 |
| 10-nonadecenoate (19:1n9)                  | Lipid | 74,346.7     | 89,838.9     | 1.208 | 0.320 |
| adrenate (22:4n6)                          | Lipid | 139,643.5    | 327,011.0    | 2.342 | 0.007 |
| arachidonate (20:4n6)                      | Lipid | 1,673,147.3  | 1,683,761.3  | 1.006 | 0.357 |
| dihomo-linoleate (20:2n6)                  | Lipid | 353,385.3    | 464,331.5    | 1.314 | 0.287 |
| eicosenoate (20:1n9 or 11)                 | Lipid | 730,483.3    | 976,684.2    | 1.337 | 0.414 |
| margarate (17:0)                           | Lipid | 647,502.4    | 849,179.1    | 1.311 | 0.131 |
| myristate (14:0)                           | Lipid | 2,443,644.6  | 2,375,114.3  | 0.972 | 0.555 |
| myristoleate (14:1n5)                      | Lipid | 57,399.7     | 33,530.7     | 0.584 | 0.439 |
| nonadecanoate (19:0)                       | Lipid | 97,539.7     | 138,763.3    | 1.423 | 0.220 |
| oleate (18:1n9)                            | Lipid | 15,455,619.5 | 21,619,338.0 | 1.399 | 0.194 |
| palmitate (16:0)                           | Lipid | 20,414,287.0 | 26,105,430.0 | 1.279 | 0.052 |
| palmitoleate (16:1n7)                      | Lipid | 3,525,606.5  | 4,286,330.5  | 1.216 | 0.943 |
| stearate (18:0)                            | Lipid | 9,465,239.0  | 12,943,878.0 | 1.368 | 0.023 |
| stearidonate (18:4n3)                      | Lipid | 112,550.4    | 154,902.6    | 1.376 | 0.801 |
| 1-arachidonoylglycerophosphocholine        | Lipid | 68,195.8     | 83,390.6     | 1.223 | 0.644 |
| 1-arachidonoylglycerophosphoethanolamine   | Lipid | 250,715.3    | 203,755.2    | 0.813 | 0.870 |
| 1-arachidonoylglycerophosphoinositol       | Lipid | 62,830.3     | 57,783.3     | 0.920 | 0.591 |
| 1-docosahexaenoylglycerophosphocholine     | Lipid | 109,913.8    | 140,244.9    | 1.276 | 0.932 |
| 1-linoleoylglycerophosphocholine           | Lipid | 442,435.3    | 554,016.0    | 1.252 | 0.627 |
| 1-linoleoylglycerophosphoethanolamine      | Lipid | 150,712.5    | 140,955.3    | 0.935 | 0.648 |

|                                             |            |              |              |       |       |
|---------------------------------------------|------------|--------------|--------------|-------|-------|
| 1-oleoylglycerophosphocholine               | Lipid      | 146,450.3    | 172,716.6    | 1.179 | 0.960 |
| 1-oleoylglycerophosphoethanolamine          | Lipid      | 208,725.6    | 187,903.8    | 0.900 | 0.902 |
| 1-oleoylglycerophosphoserine                | Lipid      | 59,903.5     | 77,825.0     | 1.299 | 0.057 |
| 1-palmitoleoylglycerophosphocholine         | Lipid      | 35,636.0     | 46,853.1     | 1.315 | 0.833 |
| 1-palmitoylglycerophosphocholine            | Lipid      | 799,570.2    | 926,561.4    | 1.159 | 0.781 |
| 1-palmitoylglycerophosphoethanolamine       | Lipid      | 168,400.4    | 234,568.7    | 1.393 | 0.014 |
| 1-palmitoylglycerophosphoinositol           | Lipid      | 27,022.0     | 19,866.1     | 0.735 | 0.274 |
| 1-palmitoylplasmenylethanolamine            | Lipid      | 105,264.7    | 106,560.3    | 1.012 | 0.840 |
| 1-stearoylglycerophosphocholine             | Lipid      | 253,471.1    | 355,529.1    | 1.403 | 0.652 |
| 1-stearoylglycerophosphoethanolamine        | Lipid      | 131,110.7    | 158,706.9    | 1.210 | 0.098 |
| 1-stearoylglycerophosphoinositol            | Lipid      | 64,657.1     | 59,587.1     | 0.922 | 0.624 |
| 2-arachidonoylglycerophosphoethanolamine    | Lipid      | 52,347.1     | 44,548.8     | 0.851 | 0.427 |
| 2-docosahexaenoylglycerophosphoethanolamine | Lipid      | 76,424.2     | 53,897.3     | 0.705 | 0.376 |
| 2-linoleoylglycerophosphocholine            | Lipid      | 75,808.5     | 79,017.0     | 1.042 | 0.576 |
| 2-oleoylglycerophosphoethanolamine          | Lipid      | 22,581.7     | 21,139.3     | 0.936 | 0.955 |
| 2-palmitoylglycerophosphocholine            | Lipid      | 65,439.2     | 71,119.3     | 1.087 | 0.581 |
| 2-palmitoylglycerophosphoethanolamine       | Lipid      | 19,815.5     | 21,900.0     | 1.105 | 0.773 |
| caprate (10:0)                              | Lipid      | 285,569.7    | 206,051.6    | 0.722 | 0.333 |
| caproate (6:0)                              | Lipid      | 34,066.4     | 36,489.7     | 1.071 | 0.434 |
| caprylate (8:0)                             | Lipid      | 78,903.1     | 69,578.4     | 0.882 | 0.730 |
| heptanoate (7:0)                            | Lipid      | 25,865.4     | 17,753.7     | 0.686 | 0.017 |
| laurate (12:0)                              | Lipid      | 1,088,136.3  | 534,824.1    | 0.492 | 0.150 |
| pelargonate (9:0)                           | Lipid      | 688,278.8    | 478,440.6    | 0.695 | 0.449 |
| 1-stearoylglycerol (1-monostearin)          | Lipid      | 57,578.5     | 127,264.9    | 2.210 | 0.026 |
| palmitoyl sphingomyelin                     | Lipid      | 3,726,457.8  | 4,504,461.0  | 1.209 | 0.297 |
| campesterol                                 | Lipid      | 527,258.7    | 709,364.3    | 1.345 | 0.542 |
| cholesterol                                 | Lipid      | 36,469,212.0 | 41,266,288.0 | 1.132 | 0.361 |
| methylphosphate                             | Nucleotide | 487,775.9    | 637,984.5    | 1.308 | 0.089 |
| inosine 5'-monophosphate (IMP)              | Nucleotide | 1,068,879.4  | 1,300,183.0  | 1.216 | 0.067 |
| adenosine 5'-diphosphate (ADP)              | Nucleotide | 178,876.5    | 178,610.8    | 0.999 | 0.625 |
| adenosine 5'-monophosphate (AMP)            | Nucleotide | 406,301.0    | 609,880.7    | 1.501 | 0.494 |
| guanosine 5'- monophosphate (5'-GMP)        | Nucleotide | 110,458.6    | 117,056.4    | 1.060 | 0.705 |
| allantoin                                   | Nucleotide | 176,673.8    | 186,126.2    | 1.054 | 0.469 |
| urate                                       | Nucleotide | 105,488.7    | 194,277.0    | 1.842 | 0.148 |
| orotate                                     | Nucleotide | 47,824.2     | 72,133.4     | 1.508 | 0.104 |
| pseudouridine                               | Nucleotide | 17,466.3     | 24,642.9     | 1.411 | 0.009 |
| uracil                                      | Nucleotide | 53,411.4     | 110,755.2    | 2.074 | 0.021 |
| uridine                                     | Nucleotide | 19,621.9     | 35,328.5     | 1.800 | 0.234 |
| alanylalanine                               | Peptide    | 92,170.3     | 138,611.0    | 1.504 | 0.059 |
| gamma- glutamylisoleucine                   | Peptide    | 73,993.0     | 74,905.0     | 1.012 | 0.178 |
| gamma- glutamylleucine                      | Peptide    | 249,140.7    | 304,864.1    | 1.224 | 0.164 |

|                                                      |             |             |             |       |       |
|------------------------------------------------------|-------------|-------------|-------------|-------|-------|
| gamma-glutamylphenylalanine                          | Peptide     | 108,877.6   | 133,112.0   | 1.223 | 0.311 |
| gamma-glutamylthreonine                              | Peptide     | 39,585.8    | 45,653.2    | 1.153 | 0.178 |
| gamma-glutamyltyrosine                               | Peptide     | 48,921.7    | 60,243.0    | 1.231 | 0.305 |
| gamma-glutamylvaline                                 | Peptide     | 262,954.1   | 293,628.1   | 1.117 | 0.085 |
| benzoate                                             | Xenobiotics | 1,477,743.8 | 1,072,581.0 | 0.726 | 0.395 |
| hippurate                                            | Xenobiotics | 146,049.5   | 187,332.9   | 1.283 | 0.090 |
| glycerol 2-phosphate                                 | Xenobiotics | 184,453.4   | 229,914.4   | 1.246 | 0.039 |
| glycolate (hydroxyacetate)                           | Xenobiotics | 1,058,732.0 | 1,039,944.5 | 0.982 | 0.841 |
| iminodiacetate (IDA)                                 | Xenobiotics | 4,988,213.5 | 7,384,151.0 | 1.480 | 0.005 |
| Isobar: 2-propylpentanoic acid, 2-ethylhexanoic acid | Xenobiotics | 161,704.1   | 132,803.9   | 0.821 | 0.733 |
| EDTA                                                 | Xenobiotics | 4,529,309.3 | 4,682,878.0 | 1.034 | 0.228 |
| cinnamoylglycine                                     | Xenobiotics | 38,667.8    | 52,321.4    | 1.353 | 0.118 |
| ergothioneine                                        | Xenobiotics | 1,204,562.1 | 1,571,682.1 | 1.305 | 0.022 |
| homostachydrine                                      | Xenobiotics | 546,046.5   | 694,373.1   | 1.272 | 0.055 |
| stachydrine                                          | Xenobiotics | 1,298,419.7 | 1,681,150.4 | 1.295 | 0.006 |
| erythritol                                           | Xenobiotics | 139,496.7   | 184,270.6   | 1.321 | 0.152 |

List of all the 218 metabolites been identified through metabolic screening in the whole blood of WT mice with Saline (Control ) or Angiotensin II infusion (Ang II). Median values were calculated from each group and then fold change of the each individual metabolite in Ang II group was conducted compared to control. N=6 mice for control group, N=5 mice for Ang II group. P<0.05 as significant changes.
